# Supplementary material for: Potency of an Inactivated Influenza Vaccine against a Challenge with A/Swine/Missouri/A01727926/2015 (H4N6) in Mice for Pandemic Preparedness
Source: MDPI journal article supplement (doi:10.3390/vaccines8040768), 2020-12-16
Supplement: s1 [file s1]

**Supplementary Materials:**

**Table S1.** Growth of H4 influenza viruses in embryonated chicken eggs.

| Viruses                                | Group            | HA titer of<br>allantoic fluid |
|----------------------------------------|------------------|--------------------------------|
| A/duck/Czechoslovakia/1956 (N4N6)      | Eurasian         | 32                             |
| A/budgerigar/Hokkaido/1/1977 (H4N6)    | Eurasian         | 128                            |
| A/duck/Hokkaido/491003/2014 (H4N2)     | Eurasian 1       | 256                            |
| A/duck/Mongolia/769/2015 (H4N6)        | Eurasian 2       | 128                            |
| A/duck/Hokkaido/138/2007 (H4N6)        | Eurasian 3       | 128                            |
| A/swan/Hokkaido/481102/2017 (H4N6)     | Eurasian 4       | 512                            |
| A/mallard/Alberta/223/1979 (H4N2)      | North American 1 | 256                            |
| A/swine/Missouri/A01727926/2015 (H4N6) | North American 2 | 256                            |

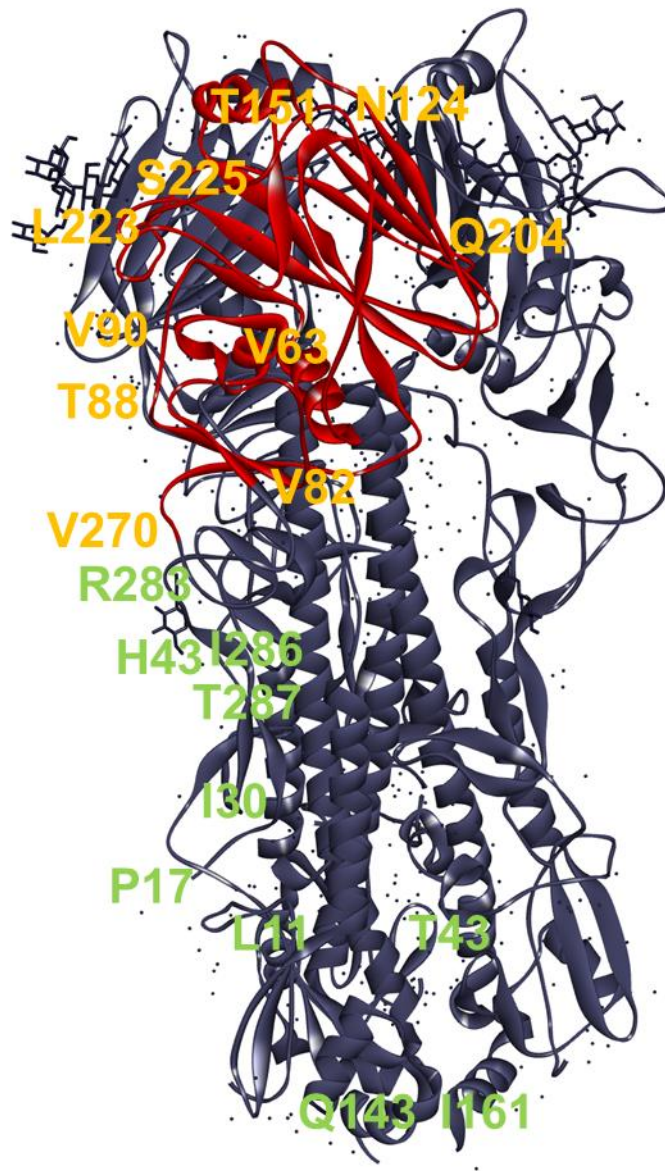

**Figure S1.** Three-D structure of MO/15 HA trimer and the positions of amino acid substitutions between MO/15 and Swan/Hok. Red: HA1 head domain, Yellow: Different residues at the head domain between MO/15 and Swan/Hok, Green: Different residues at the stalk domain between MO/15 and Swan/Hok.
